# Supplementary material
Source: MDPI journal article supplement (https://www.mdpi.com/2073-4395/10/9/1299)
Supplement: s1 [file s1]

## Supporting Information

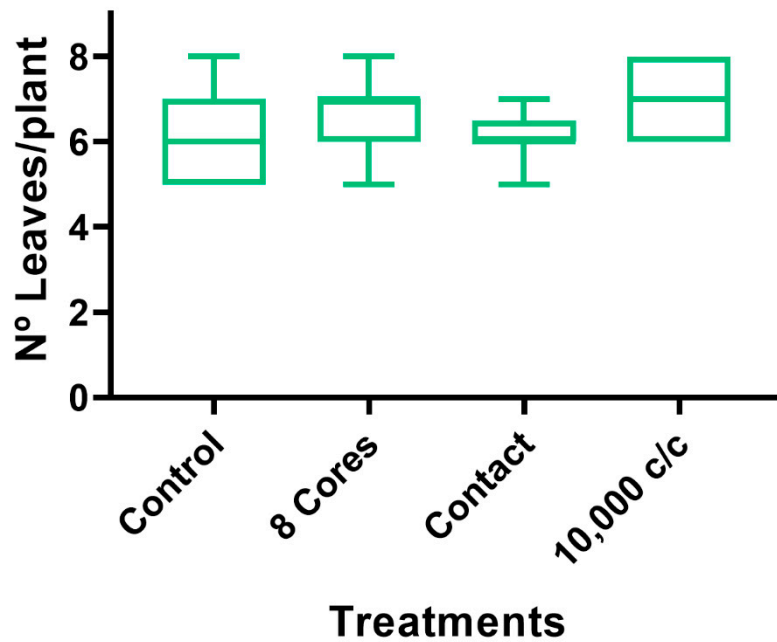

**Figure S1.** *P. chlamydosporia* effect on the number of leaves per 30-day-old banana plant. Treatments: (8 cores) from the edge of 21 days-old Pc colony; (Contact) of banana plantlet in Magenta Box with Pc for 5 days; (10,000c/c) suspension of Pc; (Control) plantlets without fungal inoculation. Treatments with different letters indicate significant differences (p-value <  $\alpha = 0.05$ ).

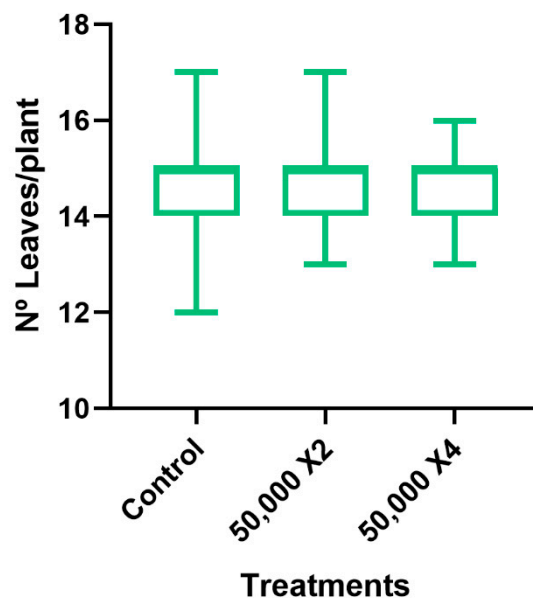

**Figure S2.** Effect of *P. chlamydosporia* 123 on the number of leaves per 105-day-old banana plant. Treatments: (50,000 x2) two spore inoculation plants; (50,000 x4) four spore inoculation plants; (Control) plants without fungal inoculation. The treatments with different letters indicate significant differences (p-value <  $\alpha = 0.05$ ).

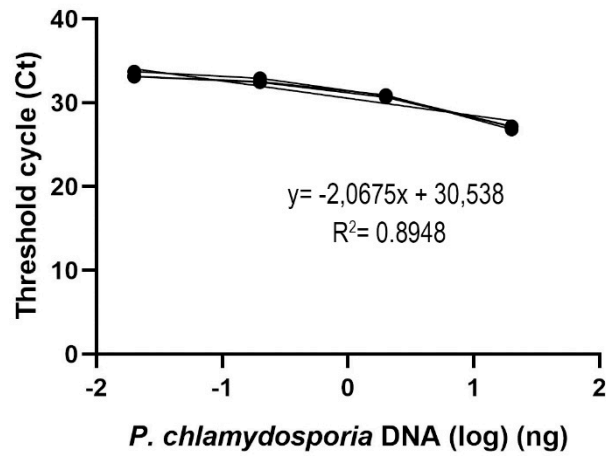

**Figure S3.** Standard curve for real-time PCR of 4-fold serial dilutions of DNA from *P. chlamydosporia*. Cycle thresholds (Ct) were plotted against the log of known concentrations of genomic DNA standards and linear regression equations were calculated for the quantification of the unknown samples by interpolation.

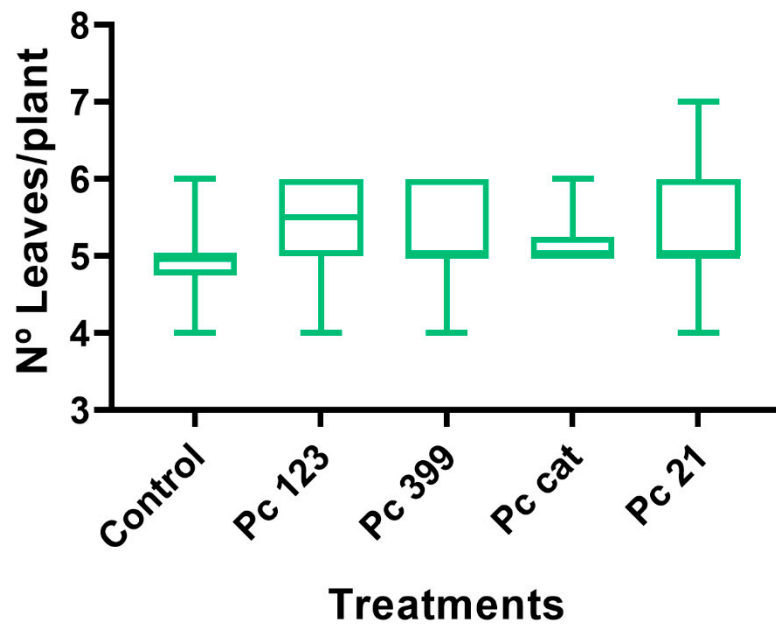

**Figure S4.** Effect of *P. chlamydosporia* diversity on the number of leaves per plant. Treatments: inoculation of 50,000 conidia and chlamydospores suspension of each Pc strains (Pc21, Pc123, Pc399, and Pccat). Treatments with different letters show significant differences (p-value <  $\alpha$  = 0.05).

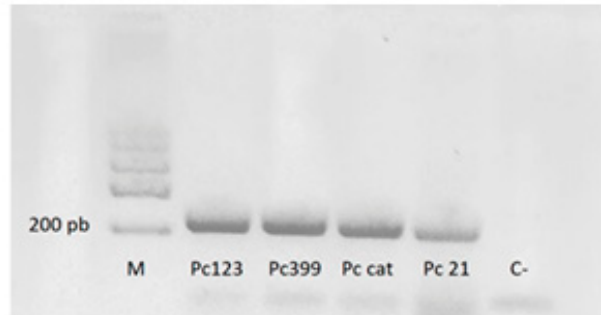

**Figure S5.** Molecular detection of *P. chlamydosporia* strains. PCR of mycelia of different strains of *P. chlamydosporia* using primers from *vpc1* gene. Abbreviations: M (ladder); Pc strains (Pc123, Pc399, Pccat, Pc21); C- (negative control, without DNA).
